# Supplementary material
Source: PubMed Central journal article supplement (PMC6997657)
Supplement: mmc1.pdf [file mmc1.pdf]

**SCIENCE CITATION INDEX EXPANDED - ORTHOPEDICS - JOURNAL LIST**

Total journals: 77

**1. ACTA CHIRURGIAE ORTHOPAEDICAE ET TRAUMATOLOGIAE CECOSLOVACA**

Bimonthly

ISSN: 0001-5415

GALEN SRO, NA BELIDLE 34, PRAGUE 5, CZECH REPUBLIC, 150 00

1. [Science Citation Index Expanded](#)

**2. ACTA ORTHOPAEDICA**

Bimonthly

ISSN: 1745-3674

E-ISSN: 1745-3682

TAYLOR & FRANCIS LTD, 2-4 PARK SQUARE, MILTON PARK, ABINGDON,  
ENGLAND, OXON, OR14 4RN

1. [Science Citation Index](#)
2. [Science Citation Index Expanded](#)
3. [Current Contents - Clinical Medicine](#)
4. [Current Contents - Life Sciences](#)
5. [BIOSIS Previews](#)

**3. ACTA ORTHOPAEDICA BELGICA**

Quarterly

ISSN: 0001-6462

E-ISSN: 0001-6462

ACTA MEDICA BELGICA, AVENUE WINSTON CHURCHILL, WINSTON CHURCHILL-  
LAAN, 11 BOX 30, BRUSSELS, BELGIUM, B-1180

1. [Science Citation Index Expanded](#)

**4. ACTA ORTHOPAEDICA ET TRAUMATOLOGICA TURCICA**

Bimonthly

ISSN: 1017-995X

E-ISSN: 1017-995X

TURKISH ASSOC ORTHOPAEDICS TRAUMATOLOGY, SEHREMINI MAH KOYUNCU  
SK CIGDEM APT NO 4 D 5 FATIH, ISTANBUL, TURKEY, 00000

1. [Science Citation Index Expanded](#)

**5. ACTA ORTOPEDICA BRASILEIRA**

Bimonthly

ISSN: 1413-7852

E-ISSN: 1809-4406

ATHA COMUNICACAO & EDITORA, RUA MACHADO BITTENCOURT, 190-40  
ANDAR, CONJ 410, SAO PAULO SP, BRAZIL, 00000

1. [Science Citation Index Expanded](#)

**6. AMERICAN JOURNAL OF SPORTS MEDICINE**

Monthly

ISSN: 0363-5465

E-ISSN: 1552-3365

SAGE PUBLICATIONS INC, 2455 TELLER RD, THOUSAND OAKS, USA, CA, 91320

1. [Science Citation Index](#)
2. [Science Citation Index Expanded](#)

3. [Current Contents - Clinical Medicine](#)

4. [BIOSIS Previews](#)

## **7. ARCHIVES OF ORTHOPAEDIC AND TRAUMA SURGERY**

Monthly

ISSN: 0936-8051

E-ISSN: 1434-3916

SPRINGER, 233 SPRING ST, NEW YORK, USA, NY, 10013

1. [Science Citation Index Expanded](#)

2. [Current Contents - Clinical Medicine](#)

3. [BIOSIS Previews](#)

## **8. ARCHIVES OF OSTEOPOROSIS**

Annual

ISSN: 1862-3522

E-ISSN: 1862-3514

SPRINGER LONDON LTD, 236 GRAYS INN RD, 6TH FLOOR, LONDON, ENGLAND,  
WC1X 8HL

1. [Science Citation Index Expanded](#)

## **9. ARTHROSCOPY-THE JOURNAL OF ARTHROSCOPIC AND RELATED SURGERY**

Monthly

ISSN: 0749-8063

E-ISSN: 1526-3231

W B SAUNDERS CO-ELSEVIER INC, 1600 JOHN F KENNEDY BOULEVARD, STE 1800,  
PHILADELPHIA, USA, PA, 19103-2899

1. [Science Citation Index](#)

2. [Science Citation Index Expanded](#)

3. [Current Contents - Clinical Medicine](#)

4. [BIOSIS Previews](#)

## **10. BMC MUSCULOSKELETAL DISORDERS**

Irregular

ISSN: 1471-2474

BMC, CAMPUS, 4 CRINAN ST, LONDON, ENGLAND, N1 9XW

1. [Science Citation Index Expanded](#)

2. [Current Contents - Clinical Medicine](#)

## **11. BONE & JOINT JOURNAL**

Monthly

ISSN: 2049-4394

E-ISSN: 2049-4394

BRITISH EDITORIAL SOC BONE JOINT SURGERY, 22 BUCKINGHAM STREET,  
LONDON, ENGLAND, WC2N 6ET

1. [Science Citation Index](#)

2. [Science Citation Index Expanded](#)

3. [Current Contents - Clinical Medicine](#)

4. [Current Contents - Life Sciences](#)

## **12. BONE & JOINT RESEARCH**

Monthly

ISSN: 2046-3758

E-ISSN: 2046-3758

BRITISH EDITORIAL SOC BONE JOINT SURGERY, 22 BUCKINGHAM STREET,

LONDON, ENGLAND, WC2N 6ET

1. [Science Citation Index Expanded](#)

### **13. BRAZILIAN JOURNAL OF PHYSICAL THERAPY**

Bimonthly

ISSN: 1413-3555

E-ISSN: 1809-9246

ASSOCIACAO BRASILEIRA PESQUISA POS-GRADUACAO FISIOTERAPIA-ABRAPG-  
FT, ROD WASHINGTON LUIS, KM 235, CAIXA POSTAL 676, SAO CARLOS SP,  
BRAZIL, CEP13565-905AP

1. [Science Citation Index Expanded](#)

### **14. CARTILAGE**

Quarterly

ISSN: 1947-6035

E-ISSN: 1947-6043

SAGE PUBLICATIONS INC, 2455 TELLER RD, THOUSAND OAKS, USA, CA, 91320

1. [Science Citation Index Expanded](#)

### **15. CLINICAL BIOMECHANICS**

Monthly

ISSN: 0268-0033

E-ISSN: 1879-1271

ELSEVIER SCI LTD, THE BOULEVARD, LANGFORD LANE, KIDLINGTON, OXFORD,  
ENGLAND, OXON, OX5 1GB

1. [Science Citation Index](#)

2. [Science Citation Index Expanded](#)

3. [Current Contents - Clinical Medicine](#)

4. [BIOSIS Previews](#)

### **16. CLINICAL JOURNAL OF SPORT MEDICINE**

Bimonthly

ISSN: 1050-642X

E-ISSN: 1536-3724

LIPPINCOTT WILLIAMS & WILKINS, TWO COMMERCE SQ, 2001 MARKET ST,  
PHILADELPHIA, USA, PA, 19103

1. [Science Citation Index](#)

2. [Science Citation Index Expanded](#)

3. [Current Contents - Clinical Medicine](#)

### **17. CLINICAL ORTHOPAEDICS AND RELATED RESEARCH**

Monthly

ISSN: 0009-921X

E-ISSN: 1528-1132

LIPPINCOTT WILLIAMS & WILKINS, TWO COMMERCE SQ, 2001 MARKET ST,  
PHILADELPHIA, USA, PA, 19103

1. [Science Citation Index](#)

2. [Science Citation Index Expanded](#)

3. [Current Contents - Clinical Medicine](#)

4. [Current Contents - Life Sciences](#)

### **18. CLINICAL SPINE SURGERY**

Monthly

ISSN: 2380-0186

E-ISSN: 2380-0186

LIPPINCOTT WILLIAMS & WILKINS, TWO COMMERCE SQ, 2001 MARKET ST,  
PHILADELPHIA, USA, PA, 19103

1. [Science Citation Index Expanded](#)
2. [Current Contents - Clinical Medicine](#)

## **19. CLINICS IN PODIATRIC MEDICINE AND SURGERY**

Quarterly

ISSN: 0891-8422

E-ISSN: 1558-2302

W B SAUNDERS CO-ELSEVIER INC, 1600 JOHN F KENNEDY BOULEVARD, STE 1800,  
PHILADELPHIA, USA, PA, 19103-2899

1. [Science Citation Index Expanded](#)
2. [Current Contents - Clinical Medicine](#)

## **20. CONNECTIVE TISSUE RESEARCH**

Bimonthly

ISSN: 0300-8207

E-ISSN: 1607-8438

TAYLOR & FRANCIS INC, 530 WALNUT STREET, STE 850, PHILADELPHIA, USA, PA,  
19106

1. [Science Citation Index](#)
2. [Science Citation Index Expanded](#)
3. [Current Contents - Life Sciences](#)
4. [BIOSIS Previews](#)

## **21. EKLEM HASTALIKLARI VE CERRAHISI-JOINT DISEASES AND RELATED SURGERY**

Tri-annual

ISSN: 1305-8282

E-ISSN: 1309-0313

TURKISH JOINT DISEASES FOUNDATION, BUGDAY SOKAK 6-27, KAVAKLIDERE,  
TURKEY, ANKARA, 06700

1. [Science Citation Index Expanded](#)

## **22. EUROPEAN CELLS & MATERIALS**

Semiannual

ISSN: 1473-2262

E-ISSN: 1473-2262

AO RESEARCH INSTITUTE DAVOS-ARI, CLAVADELERSTRASSE 8, DAVOS,  
SWITZERLAND, CH 7270

1. [Science Citation Index Expanded](#)
2. [BIOSIS Previews](#)

## **23. EUROPEAN SPINE JOURNAL**

Monthly

ISSN: 0940-6719

E-ISSN: 1432-0932

SPRINGER, 233 SPRING ST, NEW YORK, USA, NY, 10013

1. [Science Citation Index Expanded](#)
2. [Current Contents - Clinical Medicine](#)

## **24. FOOT & ANKLE INTERNATIONAL**

Monthly

ISSN: 1071-1007

E-ISSN: 1944-7876

SAGE PUBLICATIONS INC, 2455 TELLER RD, THOUSAND OAKS, USA, CA, 91320

1. [Science Citation Index Expanded](#)
2. [Current Contents - Clinical Medicine](#)

## **25. FOOT AND ANKLE CLINICS**

Quarterly

ISSN: 1083-7515

E-ISSN: 1558-1934

W B SAUNDERS CO-ELSEVIER INC, 1600 JOHN F KENNEDY BOULEVARD, STE 1800,  
PHILADELPHIA, USA, PA, 19103-2899

1. [Science Citation Index Expanded](#)
2. [Current Contents - Clinical Medicine](#)

## **26. FOOT AND ANKLE SURGERY**

Quarterly

ISSN: 1268-7731

E-ISSN: 1460-9584

ELSEVIER SCIENCE BV, PO BOX 211, AMSTERDAM, NETHERLANDS, 1000 AE

1. [Science Citation Index Expanded](#)

## **27. GAIT & POSTURE**

Bimonthly

ISSN: 0966-6362

E-ISSN: 1879-2219

ELSEVIER IRELAND LTD, ELSEVIER HOUSE, BROOKVALE PLAZA, EAST PARK  
SHANNON, CO, CLARE, IRELAND, 00000

1. [Science Citation Index](#)
2. [Science Citation Index Expanded](#)
3. [Current Contents - Clinical Medicine](#)

## **28. HAND CLINICS**

Quarterly

ISSN: 0749-0712

E-ISSN: 1558-1969

W B SAUNDERS CO-ELSEVIER INC, 1600 JOHN F KENNEDY BOULEVARD, STE 1800,  
PHILADELPHIA, USA, PA, 19103-2899

1. [Science Citation Index Expanded](#)
2. [Current Contents - Clinical Medicine](#)

## **29. HAND SURGERY & REHABILITATION**

Bimonthly

ISSN: 2468-1229

ELSEVIER, 685 ROUTE 202-206, BRIDGEWATER, USA, NJ, 08807

1. [Science Citation Index Expanded](#)

## **30. HIP INTERNATIONAL**

Bimonthly

ISSN: 1120-7000

E-ISSN: 1724-6067

SAGE PUBLICATIONS LTD, 1 OLIVERS YARD, 55 CITY ROAD, LONDON, ENGLAND,  
EC1Y 1SP

1. [Science Citation Index Expanded](#)

2. [Current Contents - Clinical Medicine](#)

**31. INDIAN JOURNAL OF ORTHOPAEDICS**

Quarterly

ISSN: 0019-5413

E-ISSN: 1998-3727

WOLTERS KLUWER MEDKNOW PUBLICATIONS, WOLTERS KLUWER INDIA PVT LTD , A-202, 2ND FLR, QUBE, C T S NO 1498A-2 VILLAGE MAROL, ANDHERI EAST, MUMBAI, INDIA, 400059

1. [Science Citation Index Expanded](#)

**32. INJURY-INTERNATIONAL JOURNAL OF THE CARE OF THE INJURED**

Monthly

ISSN: 0020-1383

E-ISSN: 1879-0267

ELSEVIER SCI LTD, THE BOULEVARD, LANGFORD LANE, KIDLINGTON, OXFORD, ENGLAND, OXON, OX5 1GB

1. [Science Citation Index Expanded](#)

2. [Current Contents - Clinical Medicine](#)

**33. INTERNATIONAL JOURNAL OF SHOULDER SURGERY**

Quarterly

ISSN: 0973-6042

E-ISSN: 0973-6042

WOLTERS KLUWER MEDKNOW PUBLICATIONS, WOLTERS KLUWER INDIA PVT LTD , A-202, 2ND FLR, QUBE, C T S NO 1498A-2 VILLAGE MAROL, ANDHERI EAST, MUMBAI, INDIA, 400059

1. [Science Citation Index Expanded](#)

**34. INTERNATIONAL ORTHOPAEDICS**

Monthly

ISSN: 0341-2695

E-ISSN: 1432-5195

SPRINGER, 233 SPRING ST, NEW YORK, USA, NY, 10013

1. [Science Citation Index Expanded](#)

2. [Current Contents - Clinical Medicine](#)

**35. ISOKINETICS AND EXERCISE SCIENCE**

Quarterly

ISSN: 0959-3020

E-ISSN: 1878-5913

IOS PRESS, NIEUWE HEMWEG 6B, AMSTERDAM, NETHERLANDS, 1013 BG

1. [Science Citation Index Expanded](#)

2. [BIOSIS Previews](#)

**36. JOURNAL OF ARTHROPLASTY**

Monthly

ISSN: 0883-5403

E-ISSN: 1532-8406

CHURCHILL LIVINGSTONE INC MEDICAL PUBLISHERS, CURTIS CENTER, INDEPENDENCE SQUARE WEST, PHILADELPHIA, USA, PA, 19106-3399

1. [Science Citation Index Expanded](#)

2. [Current Contents - Clinical Medicine](#)

**37. JOURNAL OF BACK AND MUSCULOSKELETAL REHABILITATION**

Quarterly

ISSN: 1053-8127

E-ISSN: 1878-6324

IOS PRESS, NIEUWE HEMWEG 6B, AMSTERDAM, NETHERLANDS, 1013 BG

1. [Science Citation Index Expanded](#)

### **38. JOURNAL OF BONE AND JOINT SURGERY-AMERICAN VOLUME**

Semimonthly

ISSN: 0021-9355

E-ISSN: 1535-1386

LIPPINCOTT WILLIAMS & WILKINS, TWO COMMERCE SQ, 2001 MARKET ST,  
PHILADELPHIA, USA, PA, 19103

1. [Science Citation Index](#)

2. [Science Citation Index Expanded](#)

3. [Current Contents - Clinical Medicine](#)

4. [Current Contents - Life Sciences](#)

### **39. JOURNAL OF CHILDRENS ORTHOPAEDICS**

Bimonthly

ISSN: 1863-2521

E-ISSN: 1863-2548

BRITISH EDITORIAL SOC BONE JOINT SURGERY, 22 BUCKINGHAM STREET,  
LONDON, ENGLAND, WC2N 6ET

1. [Science Citation Index Expanded](#)

2. [Current Contents - Clinical Medicine](#)

### **40. JOURNAL OF FOOT & ANKLE SURGERY**

Bimonthly

ISSN: 1067-2516

E-ISSN: 1542-2224

ELSEVIER SCIENCE INC, 360 PARK AVE SOUTH, NEW YORK, USA, NY, 10010-1710

1. [Science Citation Index Expanded](#)

2. [Current Contents - Clinical Medicine](#)

### **41. JOURNAL OF FOOT AND ANKLE RESEARCH**

Irregular

ISSN: 1757-1146

BMC, CAMPUS, 4 CRINAN ST, LONDON, ENGLAND, N1 9XW

1. [Science Citation Index Expanded](#)

2. [Current Contents - Clinical Medicine](#)

### **42. JOURNAL OF HAND SURGERY-AMERICAN VOLUME**

Monthly

ISSN: 0363-5023

E-ISSN: 1531-6564

W B SAUNDERS CO-ELSEVIER INC, 1600 JOHN F KENNEDY BOULEVARD, STE 1800,  
PHILADELPHIA, USA, PA, 19103-2899

1. [Science Citation Index Expanded](#)

2. [Current Contents - Clinical Medicine](#)

### **43. JOURNAL OF HAND SURGERY-EUROPEAN VOLUME**

Bimonthly

ISSN: 1753-1934

E-ISSN: 2043-6289

SAGE PUBLICATIONS LTD, 1 OLIVERS YARD, 55 CITY ROAD, LONDON, ENGLAND,  
EC1Y 1SP

1. [Science Citation Index](#)
2. [Science Citation Index Expanded](#)
3. [Current Contents - Clinical Medicine](#)

#### **44. JOURNAL OF HAND THERAPY**

Quarterly

ISSN: 0894-1130

E-ISSN: 1545-004X

HANLEY & BELFUS-ELSEVIER INC, 1600 JOHN F KENNEDY BOULEVARD, STE 1800,  
PHILADELPHIA, USA, PA, 19103-2899

1. [Science Citation Index Expanded](#)
2. [Current Contents - Clinical Medicine](#)

#### **45. JOURNAL OF KNEE SURGERY**

Bimonthly

ISSN: 1538-8506

E-ISSN: 1938-2480

GEORG THIEME VERLAG KG, RUDIGERSTR 14, STUTTGART, GERMANY, D-70469

1. [Science Citation Index Expanded](#)
2. [Current Contents - Clinical Medicine](#)

#### **46. JOURNAL OF ORTHOPAEDIC & SPORTS PHYSICAL THERAPY**

Monthly

ISSN: 0190-6011

E-ISSN: 1938-1344

J O S P T, 1111 NORTH FAIRFAX ST, STE 100, ALEXANDRIA, USA, VA, 22314-1436

1. [Science Citation Index](#)
2. [Science Citation Index Expanded](#)
3. [Current Contents - Clinical Medicine](#)

#### **47. JOURNAL OF ORTHOPAEDIC RESEARCH**

Monthly

ISSN: 0736-0266

E-ISSN: 1554-527X

WILEY, 111 RIVER ST, HOBOKEN, USA, NJ, 07030-5774

1. [Science Citation Index](#)
2. [Science Citation Index Expanded](#)
3. [Current Contents - Life Sciences](#)
4. [BIOSIS Previews](#)

#### **48. JOURNAL OF ORTHOPAEDIC SCIENCE**

Bimonthly

ISSN: 0949-2658

E-ISSN: 1436-2023

ELSEVIER SCIENCE BV, PO BOX 211, AMSTERDAM, NETHERLANDS, 1000 AE

1. [Science Citation Index Expanded](#)
2. [Current Contents - Clinical Medicine](#)

#### **49. JOURNAL OF ORTHOPAEDIC SURGERY**

Tri-annual

ISSN: 2309-4990

E-ISSN: 2309-4990



SAGE PUBLICATIONS INC, 2455 TELLER RD, THOUSAND OAKS, USA, CA, 91320

1. [Science Citation Index Expanded](#)

## **50. JOURNAL OF ORTHOPAEDIC SURGERY AND RESEARCH**

Irregular

ISSN: 1749-799X

E-ISSN: 1749-799X

BMC, CAMPUS, 4 CRINAN ST, LONDON, ENGLAND, N1 9XW

1. [Science Citation Index Expanded](#)
2. [Current Contents - Clinical Medicine](#)

## **51. JOURNAL OF ORTHOPAEDIC TRANSLATION**

Quarterly

ISSN: 2214-031X

E-ISSN: 2214-031X

ELSEVIER SCIENCE BV, PO BOX 211, AMSTERDAM, NETHERLANDS, 1000 AE

1. [Science Citation Index Expanded](#)

## **52. JOURNAL OF ORTHOPAEDIC TRAUMA**

Monthly

ISSN: 0890-5339

E-ISSN: 1531-2291

LIPPINCOTT WILLIAMS & WILKINS, TWO COMMERCE SQ, 2001 MARKET ST,  
PHILADELPHIA, USA, PA, 19103

1. [Science Citation Index](#)
2. [Science Citation Index Expanded](#)
3. [Current Contents - Clinical Medicine](#)

## **53. JOURNAL OF PEDIATRIC ORTHOPAEDICS**

Bimonthly

ISSN: 0271-6798

E-ISSN: 1539-2570

LIPPINCOTT WILLIAMS & WILKINS, TWO COMMERCE SQ, 2001 MARKET ST,  
PHILADELPHIA, USA, PA, 19103

1. [Science Citation Index Expanded](#)
2. [Current Contents - Clinical Medicine](#)

## **54. JOURNAL OF PEDIATRIC ORTHOPAEDICS-PART B**

Bimonthly

ISSN: 1060-152X

E-ISSN: 1473-5865

LIPPINCOTT WILLIAMS & WILKINS, TWO COMMERCE SQ, 2001 MARKET ST,  
PHILADELPHIA, USA, PA, 19103

1. [Science Citation Index Expanded](#)
2. [Current Contents - Clinical Medicine](#)

## **55. JOURNAL OF PHYSIOTHERAPY**

Quarterly

ISSN: 1836-9553

E-ISSN: 1836-9561

AUSTRALIAN PHYSIOTHERAPY ASSOC, LEVEL 3, 201 FITZROY ST, ST KILDA,  
AUSTRALIA, 3182

1. [Science Citation Index Expanded](#)
2. [Current Contents - Clinical Medicine](#)

**56. JOURNAL OF PLASTIC SURGERY AND HAND SURGERY**

Bimonthly

ISSN: 2000-656X

E-ISSN: 2000-6764

TAYLOR & FRANCIS LTD, 2-4 PARK SQUARE, MILTON PARK, ABINGDON,  
ENGLAND, OXON, OR14 4RN

1. [Science Citation Index Expanded](#)
2. [Current Contents - Clinical Medicine](#)

**57. JOURNAL OF SHOULDER AND ELBOW SURGERY**

Bimonthly

ISSN: 1058-2746

MOSBY-ELSEVIER, 360 PARK AVENUE SOUTH, NEW YORK, USA, NY, 10010-1710

1. [Science Citation Index](#)
2. [Science Citation Index Expanded](#)
3. [Current Contents - Clinical Medicine](#)

**58. JOURNAL OF THE AMERICAN ACADEMY OF ORTHOPAEDIC SURGEONS**

Monthly

ISSN: 1067-151X

E-ISSN: 1940-5480

LIPPINCOTT WILLIAMS & WILKINS, TWO COMMERCE SQ, 2001 MARKET ST,  
PHILADELPHIA, USA, PA, 19103

1. [Science Citation Index Expanded](#)
2. [Current Contents - Clinical Medicine](#)

**59. JOURNAL OF THE AMERICAN PODIATRIC MEDICAL ASSOCIATION**

Bimonthly

ISSN: 8750-7315

E-ISSN: 1930-8264

AMER PODIATRIC MED ASSOC, 9312 OLD GEORGETOWN ROAD, BETHESDA, USA,  
MD, 20814-1621

1. [Science Citation Index Expanded](#)
2. [Current Contents - Clinical Medicine](#)

**60. KNEE**

Bimonthly

ISSN: 0968-0160

E-ISSN: 1873-5800

ELSEVIER SCIENCE BV, PO BOX 211, AMSTERDAM, NETHERLANDS, 1000 AE

1. [Science Citation Index Expanded](#)

**61. KNEE SURGERY SPORTS TRAUMATOLOGY ARTHROSCOPY**

Monthly

ISSN: 0942-2056

E-ISSN: 1433-7347

SPRINGER, 233 SPRING ST, NEW YORK, USA, NY, 10013

1. [Science Citation Index](#)
2. [Science Citation Index Expanded](#)
3. [Current Contents - Clinical Medicine](#)

**62. OPERATIVE ORTHOPADIE UND TRAUMATOLOGIE**

Bimonthly

ISSN: 0934-6694

E-ISSN: 1439-0981

URBAN & VOGEL, NEUMARKTER STRASSE 43, MUNICH, GERMANY, D-81673

1. [Science Citation Index Expanded](#)

### **63. ORTHOPADE**

Monthly

ISSN: 0085-4530

E-ISSN: 1433-0431

SPRINGER, 233 SPRING ST, NEW YORK, USA, NY, 10013

1. [Science Citation Index Expanded](#)

2. [Current Contents - Clinical Medicine](#)

### **64. ORTHOPAEDIC NURSING**

Bimonthly

ISSN: 0744-6020

E-ISSN: 1542-538X

LIPPINCOTT WILLIAMS & WILKINS, TWO COMMERCE SQ, 2001 MARKET ST,  
PHILADELPHIA, USA, PA, 19103

1. [Science Citation Index Expanded](#)

2. [Social Sciences Citation Index](#)

3. [Current Contents - Social & Behavioral Sciences](#)

4. [Current Contents - Clinical Medicine](#)

### **65. ORTHOPAEDIC SURGERY**

Quarterly

ISSN: 1757-7853

E-ISSN: 1757-7861

WILEY, 111 RIVER ST, HOBOKEN, USA, NJ, 07030-5774

1. [Science Citation Index Expanded](#)

### **66. ORTHOPAEDICS & TRAUMATOLOGY-SURGERY & RESEARCH**

Bimonthly

ISSN: 1877-0568

E-ISSN: 1877-0568

ELSEVIER MASSON, CORPORATION OFFICE, 65 CAMILLE DESMOULINS CS50083  
ISSY-LES-MOULINEAUX, PARIS, FRANCE, 92442

1. [Science Citation Index Expanded](#)

2. [Current Contents - Clinical Medicine](#)

### **67. ORTHOPEDIC CLINICS OF NORTH AMERICA**

Quarterly

ISSN: 0030-5898

E-ISSN: 1558-1373

W B SAUNDERS CO-ELSEVIER INC, 1600 JOHN F KENNEDY BOULEVARD, STE 1800,  
PHILADELPHIA, USA, PA, 19103-2899

1. [Science Citation Index](#)

2. [Science Citation Index Expanded](#)

3. [Current Contents - Clinical Medicine](#)

### **68. ORTHOPEDICS**

Bimonthly

ISSN: 0147-7447

E-ISSN: 1938-2367

SLACK INC, 6900 GROVE RD, THOROFARE, USA, NJ, 08086

1. [Science Citation Index Expanded](#)
2. [Current Contents - Clinical Medicine](#)

**69. OSTEOARTHRITIS AND CARTILAGE**

Monthly

ISSN: 1063-4584

E-ISSN: 1522-9653

ELSEVIER SCI LTD, THE BOULEVARD, LANGFORD LANE, KIDLINGTON, OXFORD,  
ENGLAND, OXON, OX5 1GB

1. [Science Citation Index](#)
2. [Science Citation Index Expanded](#)
3. [Current Contents - Clinical Medicine](#)
4. [Current Contents - Life Sciences](#)

**70. PHYSICAL THERAPY**

Monthly

ISSN: 0031-9023

E-ISSN: 1538-6724

OXFORD UNIV PRESS INC, JOURNALS DEPT, 2001 EVANS RD, CARY, USA, NC, 27513

1. [Science Citation Index](#)
2. [Science Citation Index Expanded](#)
3. [Current Contents - Clinical Medicine](#)

**71. PHYSICIAN AND SPORTSMEDICINE**

Quarterly

ISSN: 0091-3847

E-ISSN: 2326-3660

TAYLOR & FRANCIS LTD, 2-4 PARK SQUARE, MILTON PARK, ABINGDON,  
ENGLAND, OXON, OR14 4RN

1. [Science Citation Index Expanded](#)

**72. PROSTHETICS AND ORTHOTICS INTERNATIONAL**

Bimonthly

ISSN: 0309-3646

E-ISSN: 1746-1553

SAGE PUBLICATIONS LTD, 1 OLIVERS YARD, 55 CITY ROAD, LONDON, ENGLAND,  
EC1Y 1SP

1. [Science Citation Index Expanded](#)
2. [Current Contents - Clinical Medicine](#)

**73. SKELETAL RADIOLOGY**

Monthly

ISSN: 0364-2348

E-ISSN: 1432-2161

SPRINGER, 233 SPRING ST, NEW YORK, USA, NY, 10013

1. [Science Citation Index](#)
2. [Science Citation Index Expanded](#)
3. [Current Contents - Clinical Medicine](#)

**74. SPINE**

Biweekly

ISSN: 0362-2436

E-ISSN: 1528-1159

LIPPINCOTT WILLIAMS & WILKINS, TWO COMMERCE SQ, 2001 MARKET ST,

PHILADELPHIA, USA, PA, 19103

1. [Science Citation Index](#)
2. [Science Citation Index Expanded](#)
3. [Current Contents - Clinical Medicine](#)
4. [BIOSIS Previews](#)

**75. SPINE JOURNAL**

Bimonthly

ISSN: 1529-9430

E-ISSN: 1878-1632

ELSEVIER SCIENCE INC, 360 PARK AVE SOUTH, NEW YORK, USA, NY, 10010-1710

1. [Science Citation Index Expanded](#)
2. [Current Contents - Clinical Medicine](#)

**76. SPORTVERLETZUNG-SPORTSCHADEN**

Quarterly

ISSN: 0932-0555

E-ISSN: 1439-1236

GEORG THIEME VERLAG KG, RUDIGERSTR 14, STUTTGART, GERMANY, D-70469

1. [Science Citation Index Expanded](#)

**77. ZEITSCHRIFT FUR ORTHOPADIE UND UNFALLCHIRURGIE**

Bimonthly

ISSN: 1864-6697

E-ISSN: 1864-6743

THIEME MEDICAL PUBL INC, 333 SEVENTH AVE, NEW YORK, USA, NY, 10001

1. [Science Citation Index Expanded](#)
2. [Current Contents - Clinical Medicine](#)
